# Supplementary material
Source: publisher site journal article supplement (https://www.spandidos-publications.com/2382/downloadSupplementary)

Figure S1. The correlation analysis of DRD2 and CDKN2A.

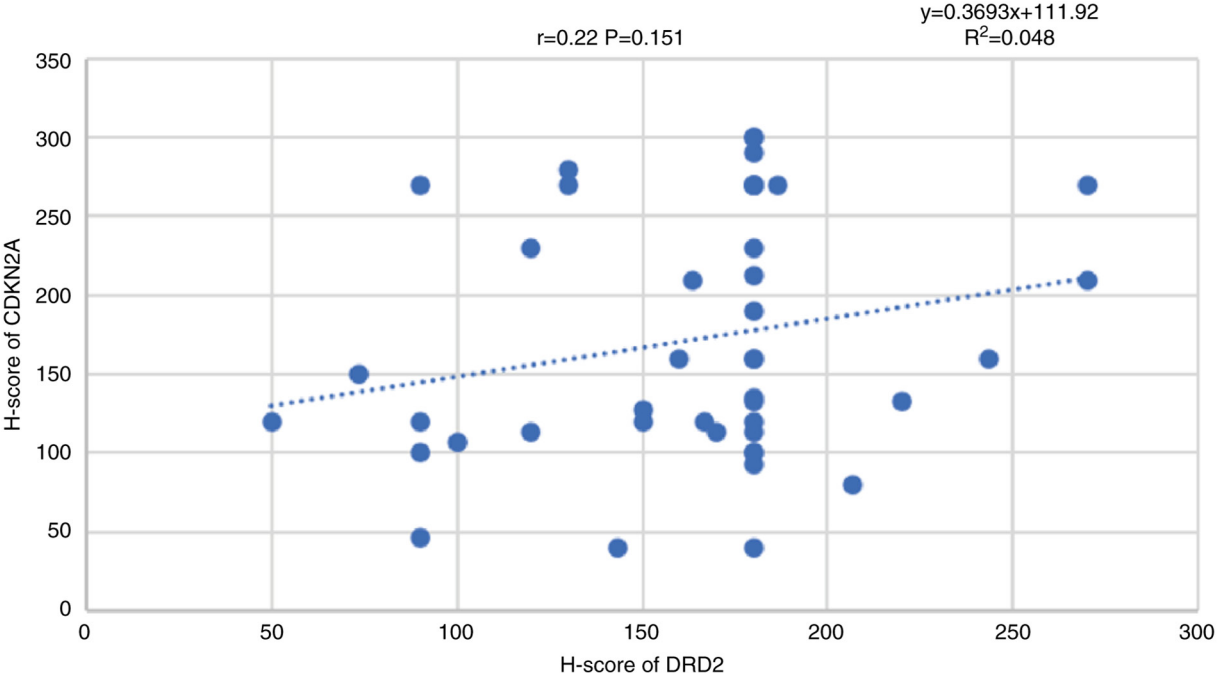

Figure S2. Original images of the cell cycle measured by flow cytometry, analyzed by FlowJo 10.6.2. (A) Original images for Fig. 4C; Palbociclib induced the G1 phase arrest in GH3. (B) Original images for Fig. 4F. Palbociclib induced the G1 phase arrest in GT1-1.

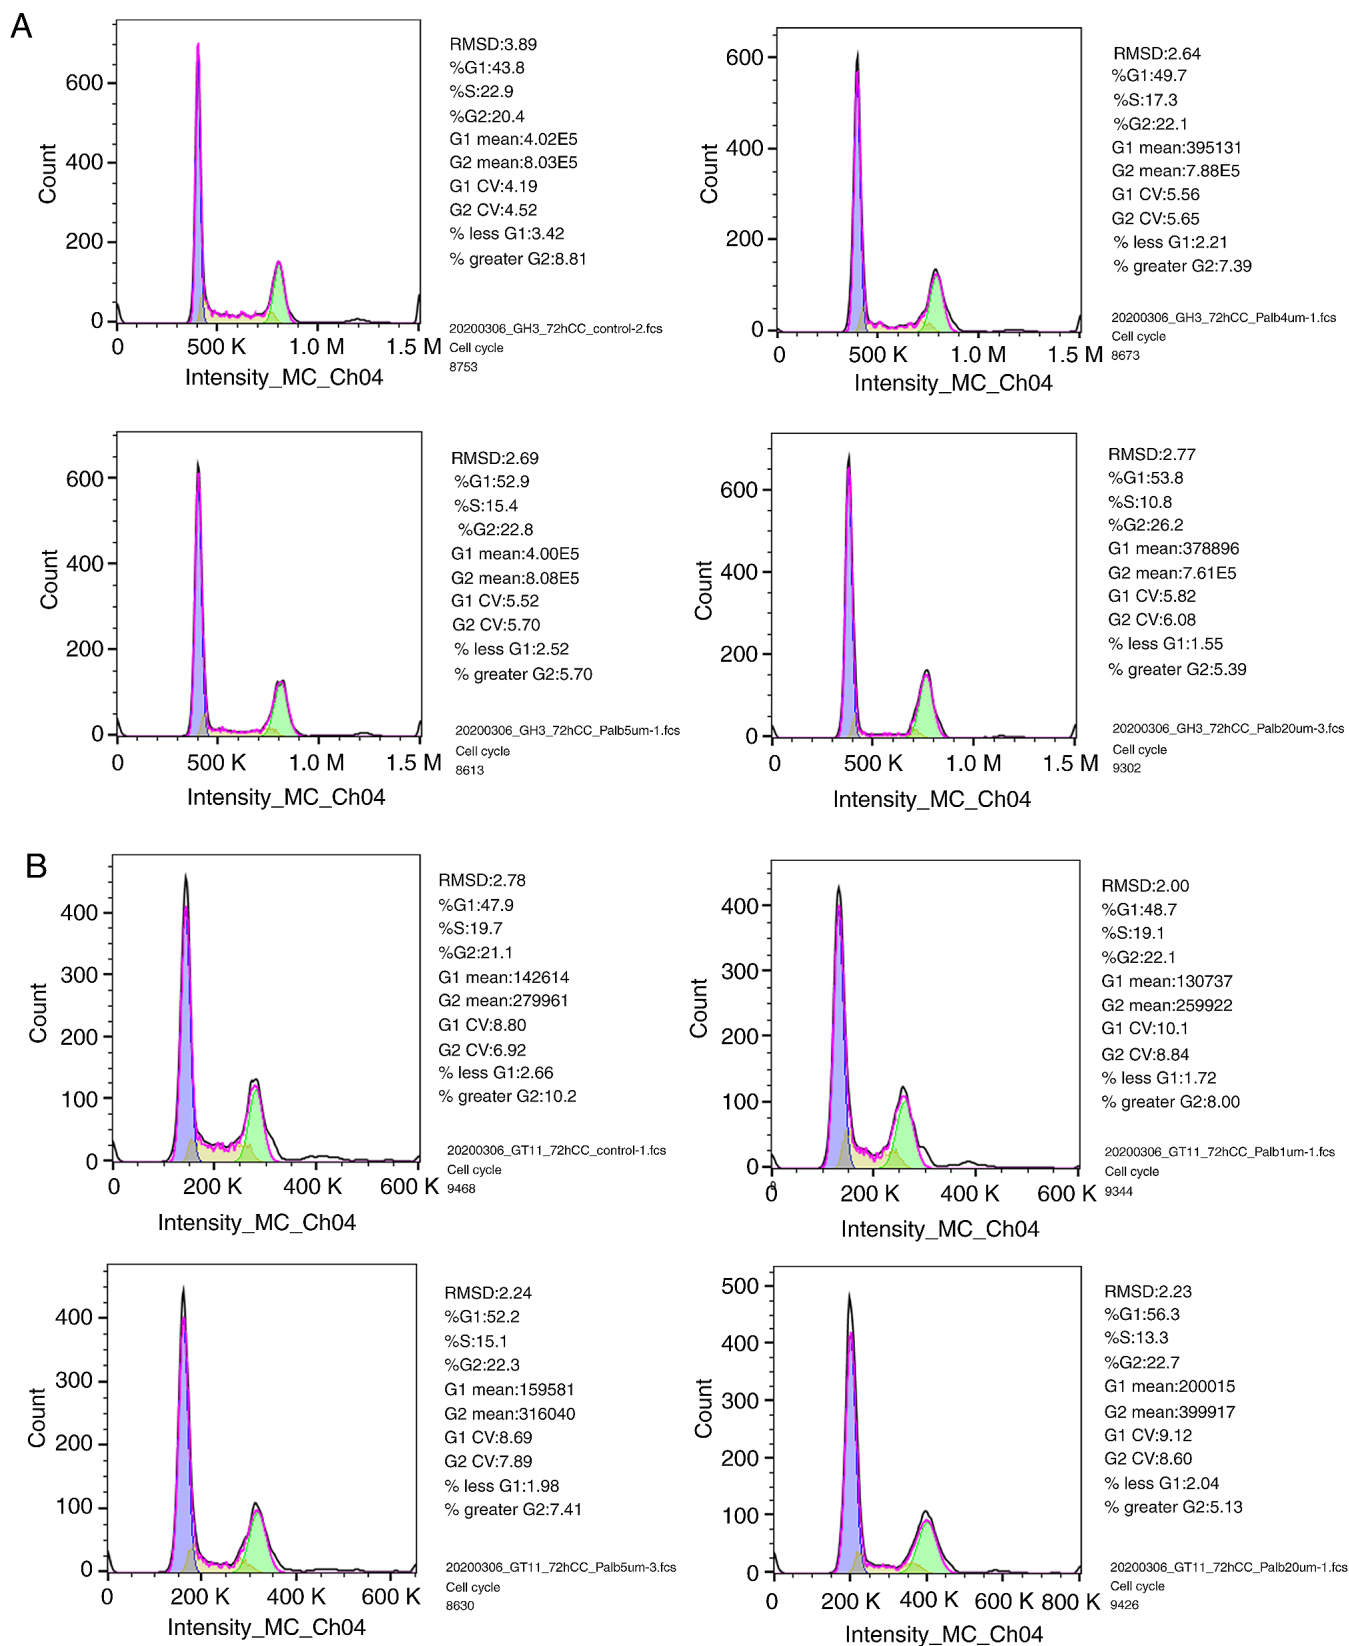

Supplement: Supplementary file 1 [file downloadSupplementary]
